# Supplementary material for: Uropathogenic E. coli Exploit CEA to Promote Colonization of the Urogenital Tract Mucosa
Source: PLOS journal article supplement (doi:10.1371/journal.ppat.1005608), 2016-05-12
Supplement: S2 (10.1371/journal.ppat.1005608.s002) [file journal.ppat.1005608.s002]

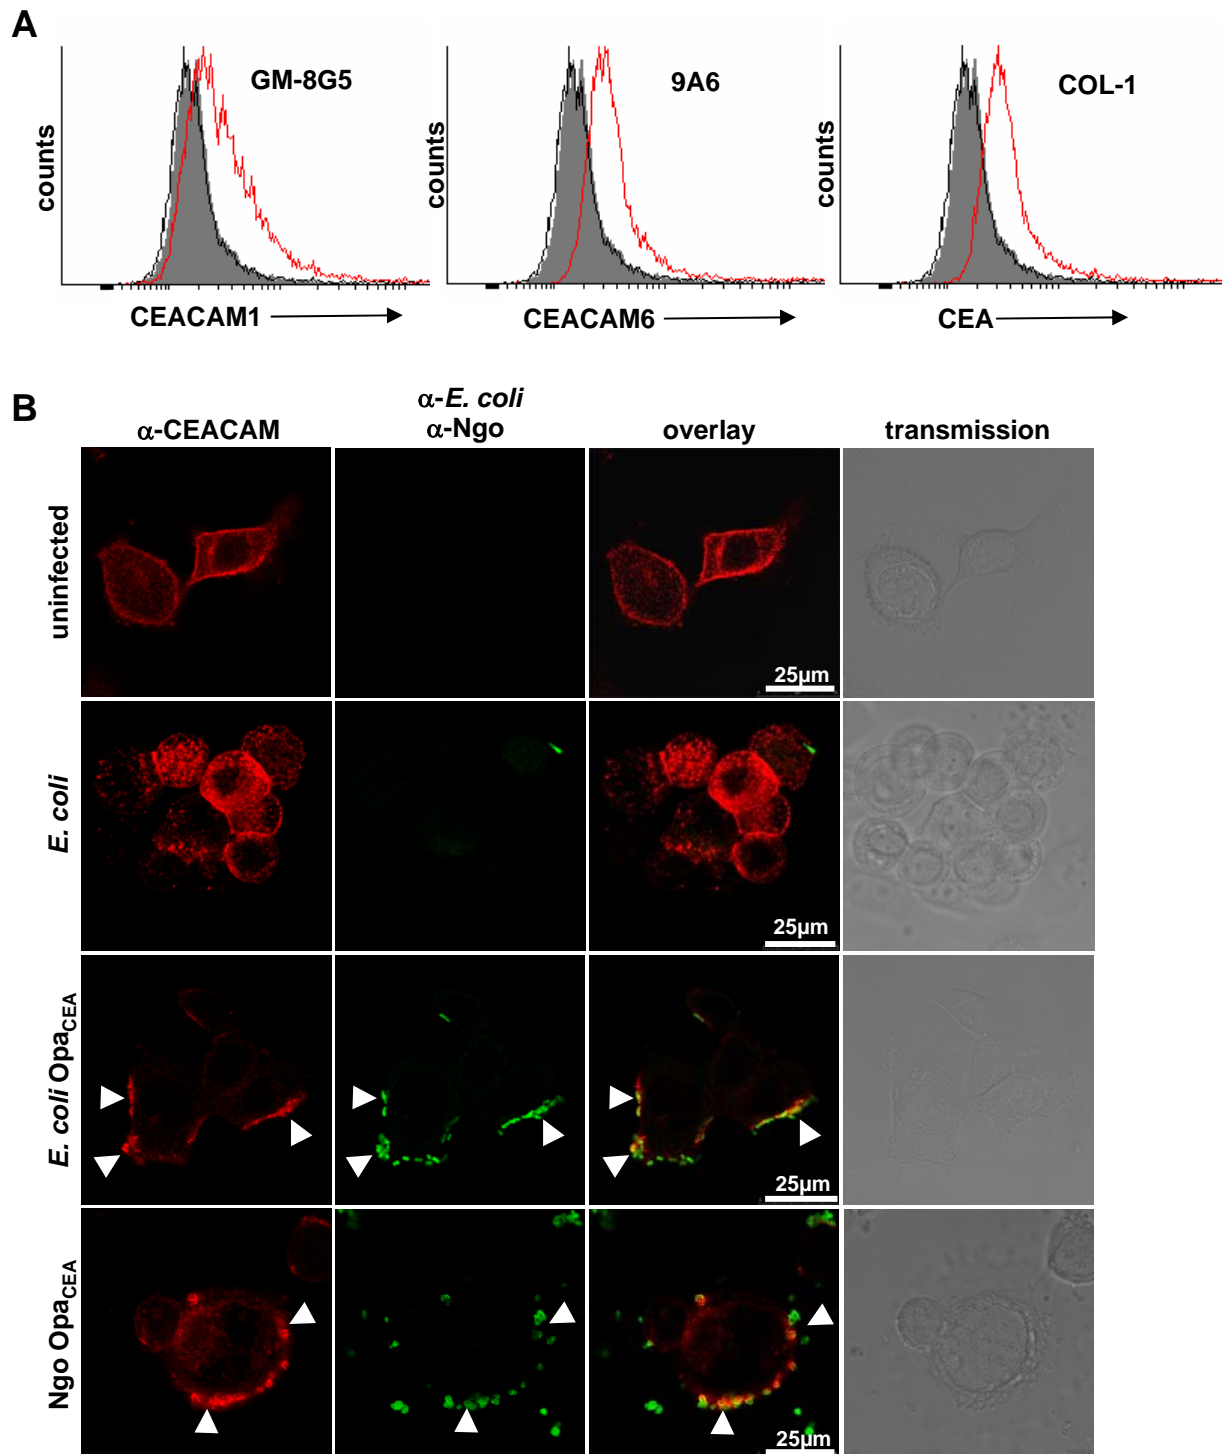

**Figure S2. *E. coli* Opa triggers recruitment of CEACAMs**

(A) ME-180 cells were analysed for endogenous CEACAMs by flow cytometry using monoclonal mAbs GM-8G5, recognizing CEACAM1 (red line), 9A6, recognizing CEACAM6 (red line), or COL-1, recognizing CEA (red line). Gray areas indicate staining of cells with isotype-matched control antibodies. (B) ME-180 cells were seeded on glasscover slips, infected or not with the indicated bacteria for 2 h with an MOI of 20, fixed and stained with antibodies against endogenous CEACAMs using clone D14HD11 (red) and rabbit  $\alpha$ -*E. coli* (green) or  $\alpha$ -*N. gonorrhoeae* (green). Bacteria bound to the CEA-positive cells are indicated by arrowheads.
